# Supplementary material for: High efficiency closed-system gene transfer using automated spinoculation
Source: PubMed Central journal article supplement (PMC8675485; doi:10.1186/s12967-021-03126-4), 2021-11-24

# Supplemental Figure 2: Functional characteristics of CAR T-cells are not affected by spinoculation

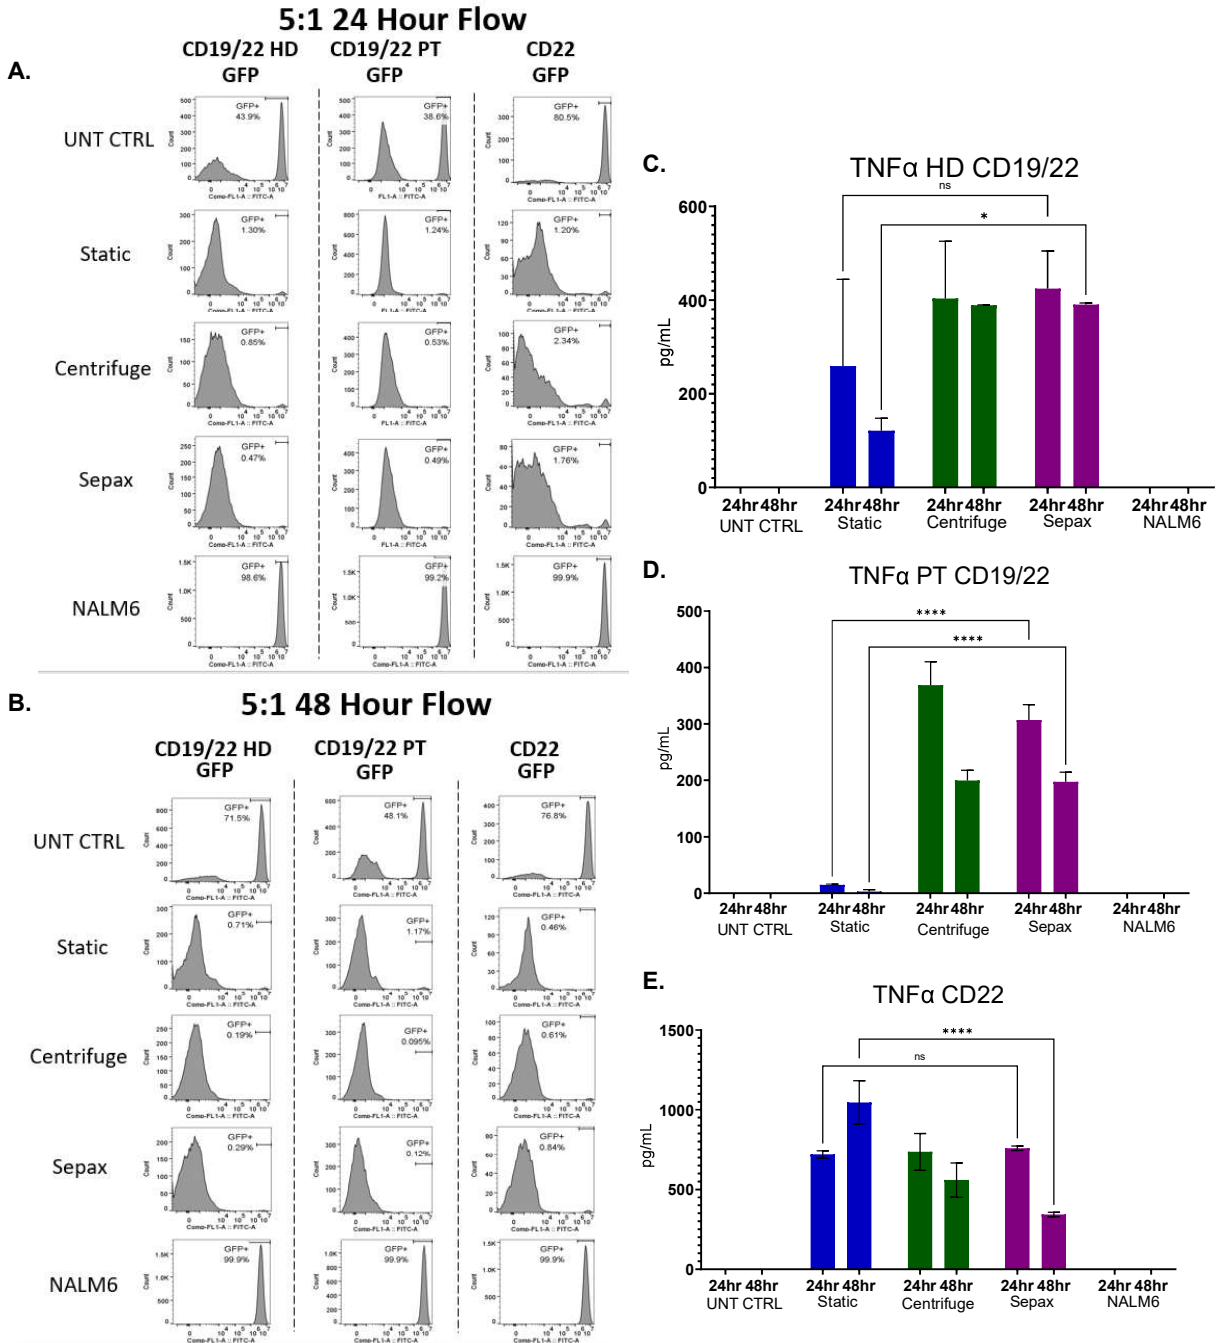

Supplement: 12967_2021_3126_MOESM1_ESM.pdf [file 12967_2021_3126_MOESM1_ESM.pdf]
